# Supplementary material
Source: Elsevier journal article supplement (https://www.sciencedirect.com/science/article/pii/S1885585717305431)

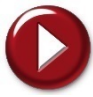

**Supplementary material**

**Pulse Wave Velocity and Central Blood Pressure: Normal and Reference Values in Older People in Spain**

**Figure of the supplementary material.** Flowchart describing the selection of the normal and reference value populations. CVD, cardiovascular disease; CVRFs, cardiovascular risk factors (untreated dyslipidemia or current smoking); DL, dyslipidemia; HT, hypertension.

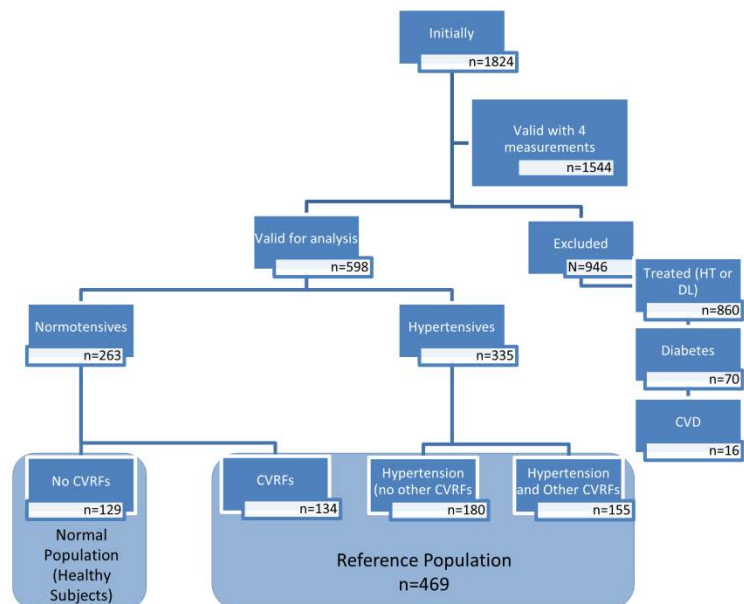

Supplement: mmc1 [file mmc1.pdf]
